# Supplementary material
Source: MDPI journal article supplement (https://www.mdpi.com/2076-3263/11/10/419)
Supplement: s1 [file s1]

Archive with 4 entries (4 files):
- List S1 Carbonate temperature calculator_notes.pdf
- List S2 Phosphate temperature calculator_notes.pdf
- Table S1 Carbonate temperature calculator.xls
- Table S2 Phosphate temperature calculator.xls
