# Supplementary material
Source: MDPI journal article supplement (https://www.mdpi.com/2076-3263/11/10/419)
Supplement: s1 [file s1 › Table S1 Carbonate temperature calculator.xls]

## Sheet: Temperatures
CALCULATOR OF PRECIPITATION TEMPERATURES OF SEDIMENTARY CALCIUM CARBONATES BASED ON THE OXYGEN ISOTOPE COMPOSTION (Version 11)1
δ18Owater (‰ VSMOW). Enter a value!			-1								MgC-Adjustment for Brand et al.'s (2013) equation. Enter a value!	0.085
Isotope values:		Temperatures calculated for calcite2
δ18Ocalcite (‰ VPDB). Enter a value!	δ18Owater (‰ VSMOW)	T (°C); Epstein et al. (1953) for molluscs	T (°C); Craig (1965) - recalculated version of the Epstein et al.' s 1953 equation	T (°C); Anderson & Arthur (1983) - recalcualted version of Craig;'s 1965 equation, original formula	T (°C); Anderson & Arthur (1983) - recalcualted version of Craig;'s 1965 equation, corrected for a new relation between VSMOW-VPDB scales	δ18Ocalcite (‰ SMOW). Calculated with a formula of Friedman & O'Neil, 1977	T (°C) Friedman & O'Neil (1977) for synthetic calcite	δ18Ocalcite (‰ VSMOW). Calculated with a formula of Coplen et al., 1983	T (°C) Hays & Grossman (1991) - recalculated version of Friedman and O’Neil's 1977 equation)	T (°C) Kim & O'Neil (1997) for synthetic calcite, corrected for conventional CO2-calcite acid fractionation factor of 1,01025)	T (°C) Coplen (2007) for inorganic calcite from Devils Hole	T (°C) Brand et al. (2013) for brachiopod calcite adjusted for MgCO3 effect (its value should be given above)	T (°C) Kele et al. (2015) for travertines and tufas	T (°C) Erez & Luz (1983) for Globigerinoides sacculifer foraminifers, original formula, corrected for SMOW scale	T (°C) Bouvier-Soumagnac & Duplessy (1985) for Orbulina universa (cultured), corrected for SMOW scale	T (°C) Bouvier-Soumagnac & Duplessy (1985) for Orbulina universa (Indian Ocean), corrected for SMOW scale	T (°C) Bemis et al., (1998) for Orbulina universa foraminifers - "low light"	T (°C) Bemis et al., (1998) for Orbulina universa foraminifers - "high light"	T (°C) Bemis et al., (1998) for Globigerina bulloides foraminifers - (11-chambered shells), corrected for SMOW scale	T (°C) Bemis et al., (1998) for Globigerina bulloides foraminifers - (12-chambered shells), corrected for SMOW scale	T (°C) Bemis et al., (1998) for Globigerina bulloides foraminifers - (13-chambered shells), corrected for SMOW scale	T (°C) Lynch-Stieglitz et al., (1999) for Cibicidoides-Planulina foraminifers	T (°C) Mulitza et al., (2003) for Globigerinoides sacculifer foraminifers, corrected for SMOW scale	T (°C) Mulitza et al., (2003) for Globigerinoides ruber (white) foraminifers, corrected for SMOW scale	T (°C) Mulitza et al., (2003) for Globigerina bulloides foraminifers, corrected for SMOW scale	T (°C) Mulitza et al., (2003) for Neogloboquadrina pachyderma foraminifers, corrected for SMOW scale	T (°C) Barras et al., (2010) for Bulimina marginata foraminifers - (≤150 μm size fraction), corrected for SMOW scale	T (°C) Barras et al., (2010) for Bulimina marginata foraminifers - (150 - 200 μm size fraction), corrected for SMOW scale	T (°C) Barras et al., (2010) for Bulimina marginata foraminifers - (200 - 250 μm size fraction), corrected for SMOW scale	T (°C) Barras et al., (2010) for Bulimina marginata foraminifers - (>250 μm size fraction), corrected for SMOW scale	T (°C) Marchitto et al., (2014) for Cibicidoides-Planulina foraminifers, quadratic fit for all data	T (°C) Marchitto et al., (2014) for Uvigerina foraminifers, quadratic fit for all data
-2	-1	19.7827	20.1026	20.27	20.0571	28.7983	20.3059	28.8482	20.18	19.4954	26.6412	19.9548	29.8781	20.5439	20.096	19.208	20.004	18.404	16.3011	16.7697	17.0821	19.5648	18.0855	17.4412	18.051	15.2815	18.5642	19.0077	19.3653	20.8063	19.2568	21.244
-1.5	-1	17.541	17.9164	18.1025	17.8959	29.3137	18.0555	29.3636	17.91	17.1354	24.0762	18.2208	27.1649	18.268	17.761	16.803	17.604	16.004	13.7661	14.3247	14.6971	17.1848	15.9105	15.2212	15.701	13.5065	16.2942	16.7627	17.0603	18.1513	16.8215	18.8621
-1	-1	15.3707	15.7965	16	15.7997	29.8291	15.8571	29.8791	15.7	14.8144	21.5559	16.4868	24.5012	16.0071	15.426	14.398	15.204	13.604	11.2311	11.8797	12.3121	14.8048	13.7355	13.0012	13.351	11.7315	14.0242	14.5177	14.7553	15.4963	14.4473	16.5223
-0.5	-1	13.2719	13.7429	13.9625	13.7685	30.3446	13.7089	30.3945	13.55	12.5313	19.0793	14.7528	21.8856	13.7612	13.091	11.993	12.804	11.204	8.6961	9.4347	9.9271	12.4248	11.5605	10.7812	11.001	9.9565	11.7542	12.2727	12.4503	12.8413	12.13	14.2224
0	-1	11.2445	11.7557	11.99	11.8023	30.86	11.6089	30.91	11.46	10.2853	16.6452	13.0188	19.3168	11.5303	10.756	9.588	10.404	8.804	6.1611	6.9897	7.5421	10.0448	9.3855	8.5612	8.651	8.1815	9.4842	10.0277	10.1453	10.1863	9.86556	11.9605
0.5	-1	9.28849	9.83482	10.0825	9.90111	31.3754	9.55534	31.4255	9.43	8.07536	14.2524	11.2848	16.7937	9.31435	8.421	7.183	8.004	6.404	3.6261	4.5447	5.1571	7.6648	7.2105	6.3412	6.301	6.4065	7.2142	7.7827	7.8403	7.5313	7.65055	9.73476
1	-1	7.40397	7.98028	8.24	8.06491	31.8909	7.5466	31.9409	7.46	5.90073	11.9001	9.55078	14.3149	7.11345	6.086	4.778	5.604	4.004	1.0911	2.0997	2.7721	5.2848	5.0355	4.1212	3.951	4.6315	4.9442	5.5377	5.5353	4.8763	5.48186	7.54348
	-1
	-1
	-1
Isotope values:		Temperatures calculated for aragonite2
δ18Oaragonite (‰ VPDB). Enter a value!	δ18Owater (‰ VSMOW)	T (°C); Grossman & Ku (1986) for mollusks, corrected for SMOW scale	T (°C); Grossman & Ku (1986) for "all (skeletal) data", corrected for SMOW scale	T (°C); Böhm et al. (2000), linear equation no. (4)	δ18Ocalcite (‰ VSMOW). Calculated with a formula of Coplen et al., 1983.	T (°C); Böhm et al. (2000), fractionation factor equation no. (5)	T (°C); Zhou & Zheng (2003) for synthetic aragonites	T (°C); Kim et al. (2007) for synthetic aragonite; corrected for conventional CO2-calcite acid fractionation factor of 1,01025)	T (°C); Patterson et al. (1993) for fish otoliths, fractionation factor formula	T (°C); Thorrold et al. (1997) for fish otoliths	T (°C); White et al. (1999) for freshwater molluscs, fractionation factor equation	T (°C); White et al. (1999) for freshwater molluscs, linear equation	T (°C); Høie et al. (2004) for fish otoliths, fractionation factor equation	T (°C); Høie et al. (2004) for fish otoliths, linear equation	T (°C) Marchitto et al., (2014) for Hoeglundina elegans foraminifers, quadratic fit for all data
-2	-1	25.552	24.072	24.42	28.8482	24.5247	15.0604	23.858	21.779	26.2995	26.6866	26.19	23.1507	23.4	23.2606
-1.5	-1	23.207	21.902	22.21	29.3636	22.1384	13.0392	21.4072	19.4501	23.899	24.0206	23.775	20.5485	20.9	21.0838
-1	-1	20.862	19.732	20	29.8791	19.7913	11.0471	18.9978	17.1589	21.5378	21.4028	21.36	17.9928	18.4	18.9193
-0.5	-1	18.517	17.562	17.79	30.3945	17.4823	9.08358	16.6286	14.9044	19.215	18.8321	18.945	15.4825	15.9	16.7668
0	-1	16.172	15.392	15.58	30.91	15.2105	7.14793	14.2987	12.6857	16.9297	16.3071	16.53	13.0163	13.4	14.6262
0.5	-1	13.827	13.222	13.37	31.4255	12.9751	5.2396	12.0071	10.502	14.681	13.8266	14.115	10.5931	10.9	12.4973
1	-1	11.482	11.052	11.16	31.9409	10.7752	3.35801	9.75285	8.35255	12.468	11.3895	11.7	8.21172	8.4	10.3799
	-1
	-1
	-1
1 The calculator was developed by H. Wierzbowski.
2 Each equation has been calibrated for a specified temperature range (see "calculator notes")
