# Supplementary material
Source: MDPI journal article supplement (https://www.mdpi.com/2076-3263/11/10/419)
Supplement: s1 [file s1 › Table S2 Phosphate temperature calculator.xls]

## Sheet: Temperatures
CALCULATOR OF PRECIPITATION TEMPERATURES OF BIOGENIC PHOSPHATES BASED ON THE OXYGEN ISOTOPE COMPOSTION (Version 11)1
δ18Owater (‰ VSMOW). Enter a value!:			-1
Isotope values:	Temperatures calculated for phosphate2:
δ18Ophosphate (‰ VSMOW). Enter a value!	T (°C); Longinelli & Nuti (1973a) for molluscs; corrected for NBS 120b of 21.4‰ VSMOW	T (°C); Kolodny et al. (1983) for fish; corrected for NBS 120b of 21.4‰ VSMOW	T (°C); Kolodny et al. (1983)for fish; corrected for NBS 120b of 21.4‰ VSMOW as reported by Lécuyer et al. (2013)	T (°C); Lécuyer et al. (1996) for lingulids	T (°C); Pucéat et al. (2010) eq. (1) for fish; corrected for NBS 120c of 21.7‰ VSMOW	T (°C); Pucéat et al. (2010) eq. (2 and 3 )for all published data; version for NBS 120c of 21.7‰ VSMOW	T (°C) Lécuyer et al. (2013) eq. (2) for lingulids and sharks
18	35.72	36.212	36.08	32.4	34.652	34.722	31.9
19	31.42	31.832	31.7	28.2	30.132	30.502	27.4
20	27.12	27.452	27.32	24	25.612	26.282	22.9
21	22.82	23.072	22.94	19.8	21.092	22.062	18.4
22	18.52	18.692	18.56	15.6	16.572	17.842	13.9
23	14.22	14.312	14.18	11.4	12.052	13.622	9.4
24	9.92	9.932	9.8	7.2	7.532	9.402	4.9
1 The calculator was developed by H. Wierzbowski.
2 Each equation has been calibrated for a specified temperature range (see "calculator notes")
